# Supplementary material for: Nickel(ii) complex covalently anchored on core shell structured SiO2@Fe3O4 nanoparticles: a robust and magnetically retrievable catalyst for direct one-pot reductive amination of ketones
Source: Royal Society of Chemistry journal article supplement (doi:10.1039/c5nj02495a), 2015-12-15

**NEW JOURNAL OF CHEMISTRY**

**Supporting Information**

**Nickel (II) complex covalently anchored on core shell structured SiO<sub>2</sub>@Fe<sub>3</sub>O<sub>4</sub> nanoparticles: A robust and magnetically retrievable catalyst for direct one-pot reductive amination of ketones**

Rakesh Kumar Sharma\*, Sriparna Dutta and Shivani Sharma

*Green Chemistry Network Centre, Department of Chemistry, University of Delhi, Delhi-110007, India*

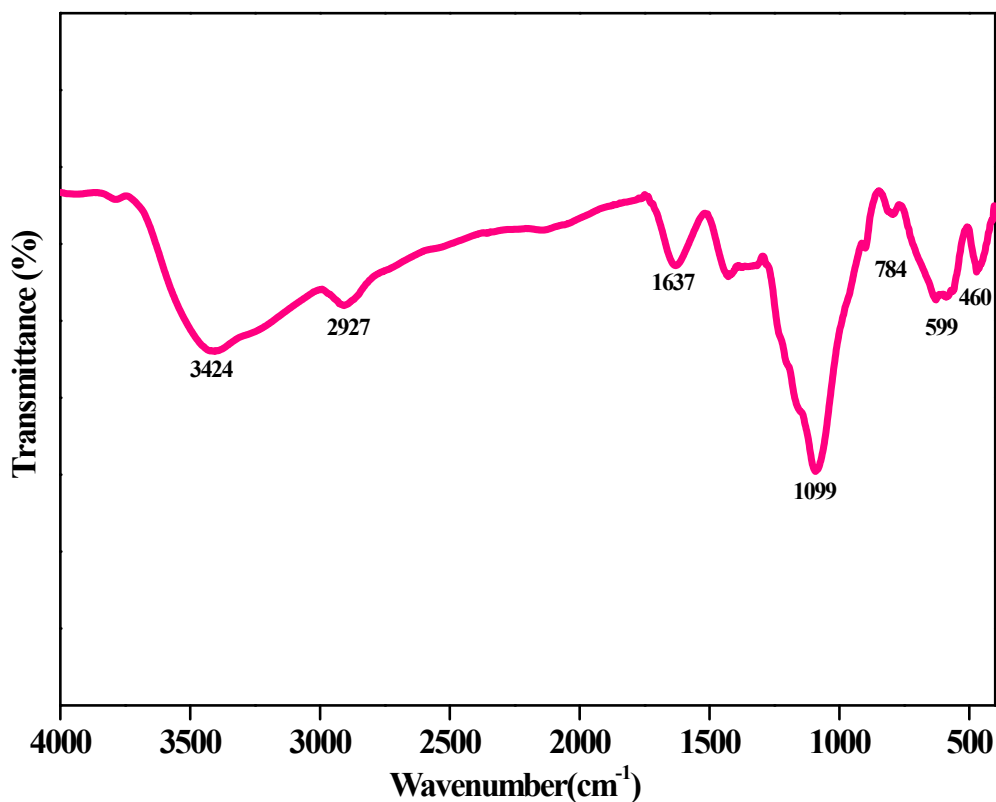

**Fig. S1** FTIR spectrum of recovered catalyst (obtained after 8 runs).

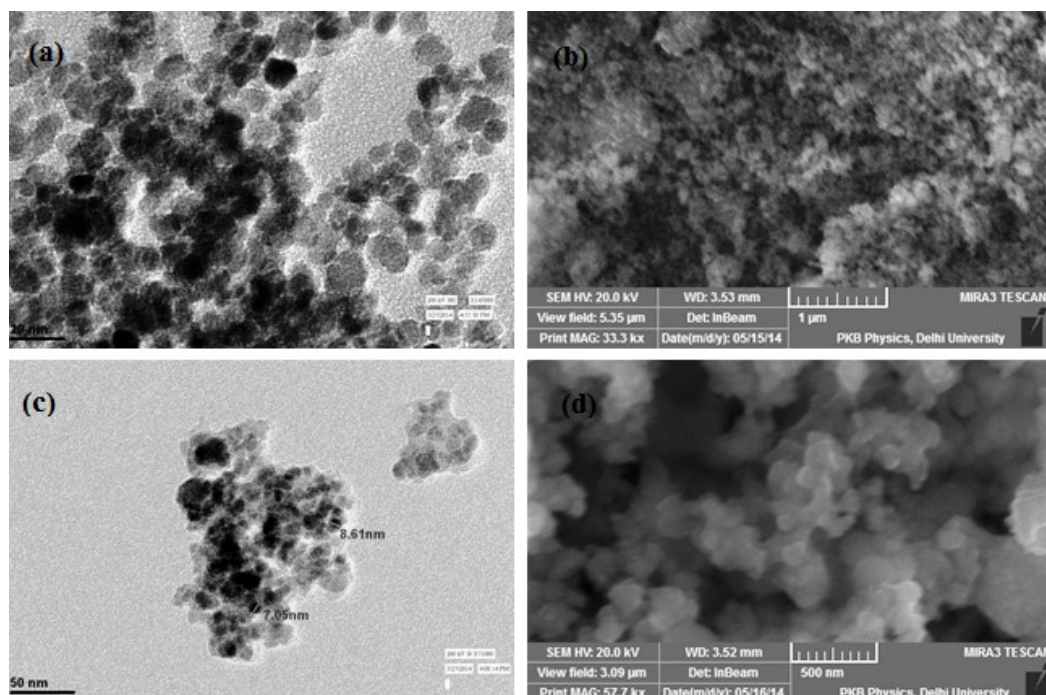

**Fig. S2** TEM images of (a)  $\text{SiO}_2@\text{Fe}_3\text{O}_4$ , (c) recovered  $\text{Ni-2AF@Am-SiO}_2@\text{Fe}_3\text{O}_4$  nanocatalyst (obtained after 8 runs) and SEM images of (b)  $\text{SiO}_2@\text{Fe}_3\text{O}_4$ , (d) recovered  $\text{Ni-2AF@Am-SiO}_2@\text{Fe}_3\text{O}_4$  nanocatalyst (obtained after 8 runs).

**Table S1** Screening of various catalysts for the synthesis of secondary amines *via* direct one-pot reductive amination of ketones<sup>a</sup>

| Entry | Catalyst                                             | Conversion (%) <sup>b</sup> |
|-------|------------------------------------------------------|-----------------------------|
| 1.    | No catalyst                                          | -                           |
| 2.    | $\text{NiSO}_4 \cdot 6\text{H}_2\text{O}$            | 58                          |
| 3.    | $\text{NiCl}_2$                                      | 87                          |
| 4.    | $\text{NiBr}_2$                                      | 82                          |
| 5.    | $\text{Ni}(\text{NO}_3)_2 \cdot 6\text{H}_2\text{O}$ | 65                          |
| 6.    | $\text{Ni}(\text{OAc})_2 \cdot 4\text{H}_2\text{O}$  | 99                          |
| 7.    | $\text{Ni-ACF@Am-SiO}_2@\text{Fe}_3\text{O}_4$       | 100                         |

<sup>a</sup>Reaction Conditions: [Aniline (1mmol), acetone (1 mmol),  $\text{NaBH}_4$  (1 mmol), catalyst (25 mg), r.t.].

<sup>b</sup>Conversion % was determined by GC-MS.

**Table S2** Effect of reductant on the synthesis of secondary amines *via* direct one-pot reductive amination of ketones<sup>a</sup>

| Sl. No | Reductant              | Conversion (%) <sup>b</sup> |
|--------|------------------------|-----------------------------|
| 1.     | DIBAL                  | Trace                       |
| 2.     | Glucose                | NR <sup>c</sup>             |
| 3.     | Zinc                   | 40                          |
| 4.     | NaBH(OAc) <sub>3</sub> | 95                          |
| 5.     | NaBH <sub>4</sub>      | 100                         |

<sup>a</sup>Reaction Conditions: [Aniline (1 mmol), acetone (1 mmol), reductant (1 mmol), Ni-ACF@Am-SiO<sub>2</sub>@Fe<sub>3</sub>O<sub>4</sub> (25 mg), r.t.].

<sup>b</sup>Conversion % was determined using GC-MS.

<sup>c</sup>No reaction.

### <sup>13</sup>C CPMAS SOLID-STATE NMR of non-magnetic silica analog

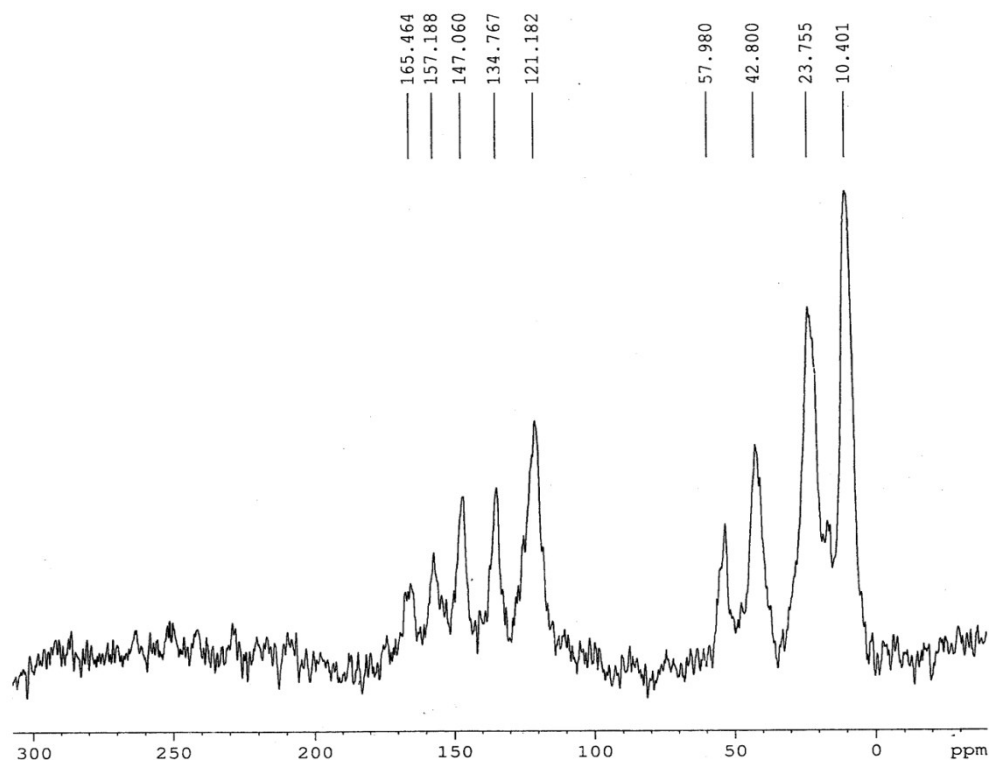

<sup>13</sup>C cross-polarization-magic angle spinning (CP-MAS) solid-state NMR spectroscopy provides information regarding the coordination environment of carbon atoms present in the silica based organic-inorganic hybrid materials. The above figure depicts the <sup>13</sup>C CPMAS NMR spectrum of non magnetic silica analog containing organonickel complex. The

spectrum exhibits signals at  $\delta = 10.4, 23.7$  and  $57.9$  ppm which are assigned to the three methylene groups ( $\text{Si-CH}_2-$ ,  $-\text{CH}_2-$  and  $-\text{N-CH}_2-$ ) of the propyl chain of APTES. The peak at  $42.8$  ppm refers to the uncomplexed  $-\text{N-CH}_2-$  group. In addition to these peaks, the peaks appearing in the range of  $120-160$  ppm are attributed to the various aromatic carbons. Furthermore, the appearance of a new predominant peak at  $165.4$  ppm can be assigned to the carbon of  $\text{C=N}$  which clearly confirms the covalent grafting of organo nickel complex on the surface of the amine functionalized support material.

### Mass spectra of synthesized amine products

#### Table 1 in the manuscript

Entry 1

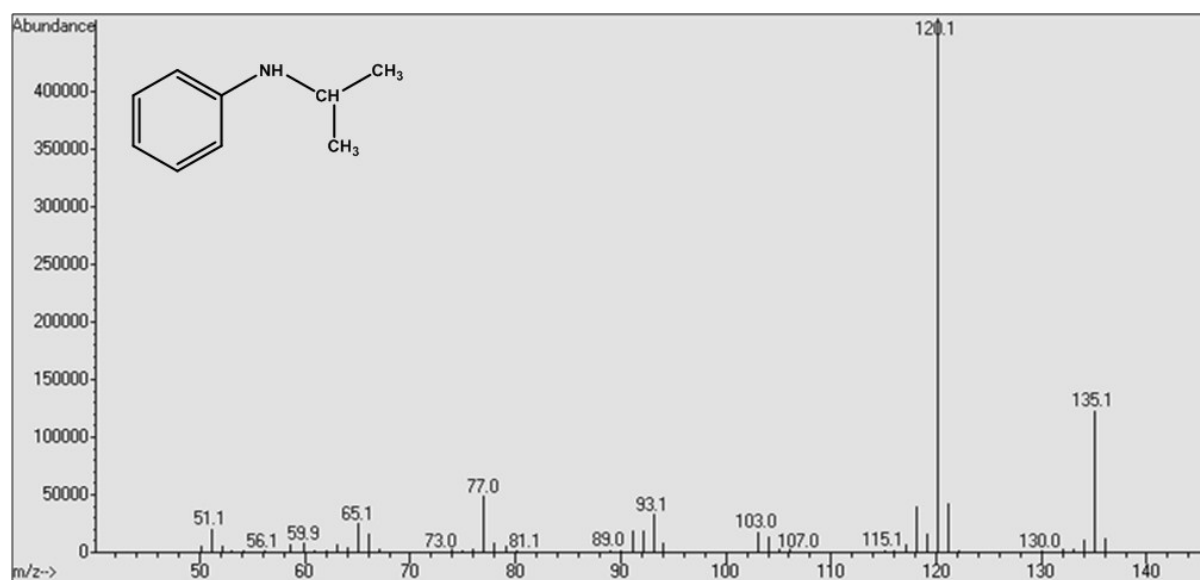

Entry 2

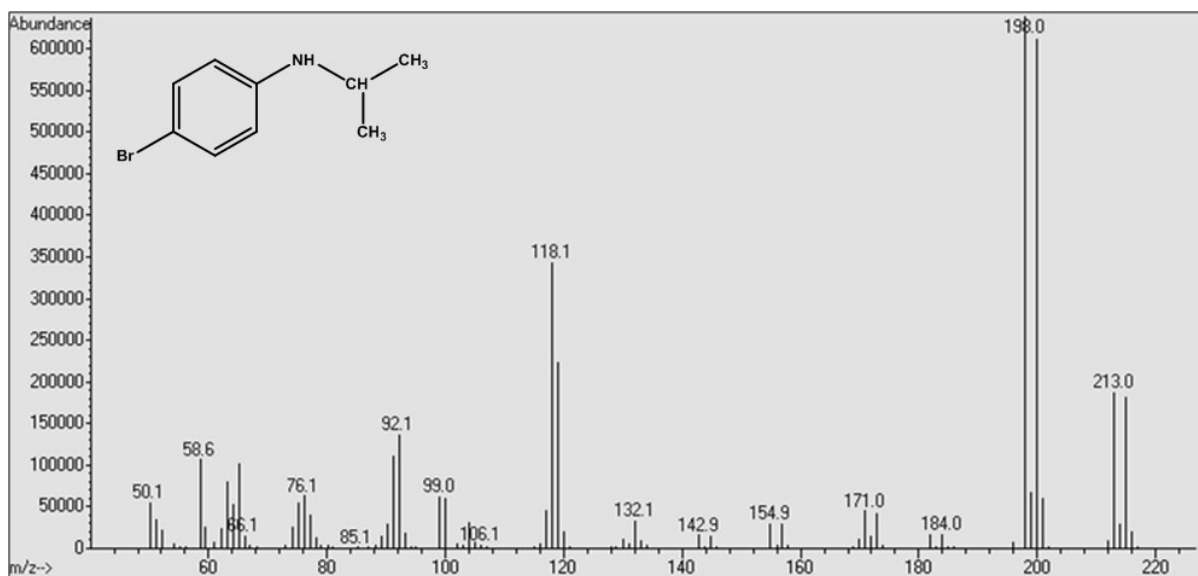

Entry 3

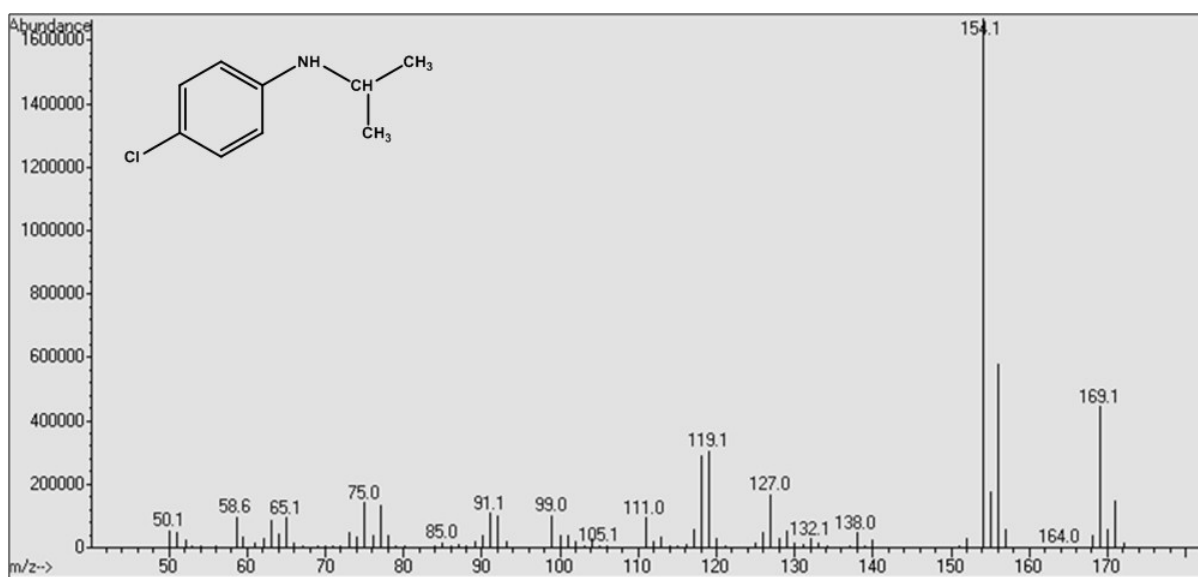

Entry 4

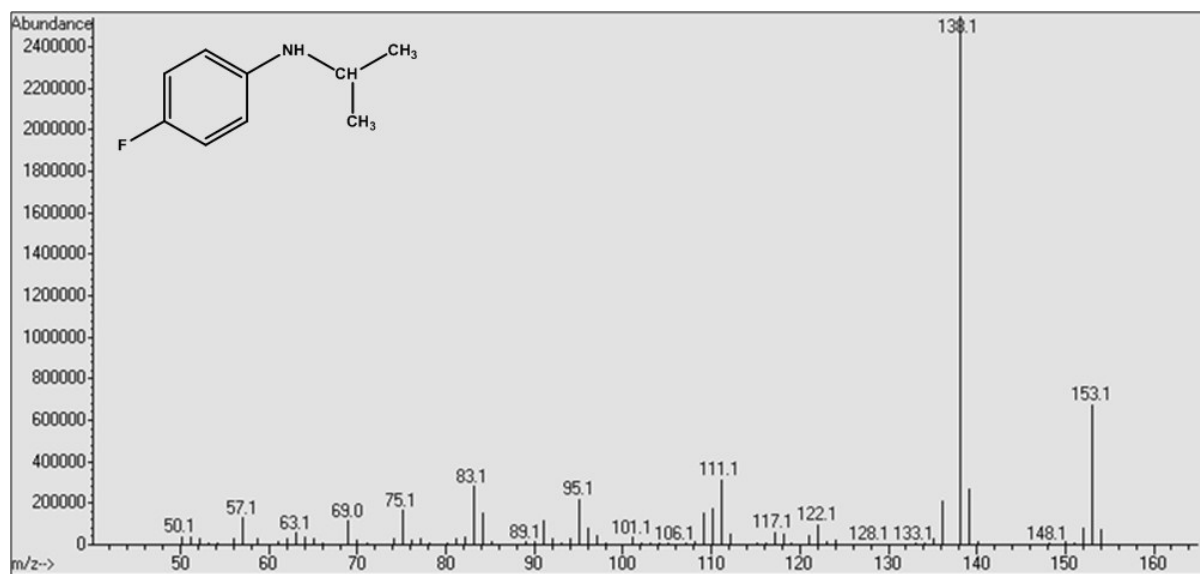

### Entry 5

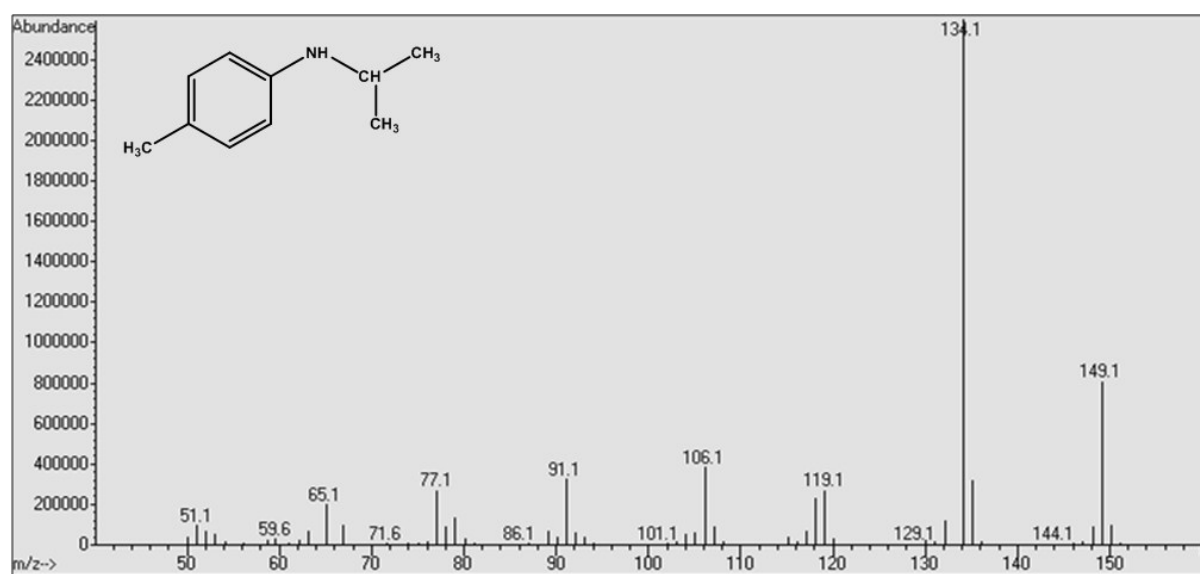

## Entry 6

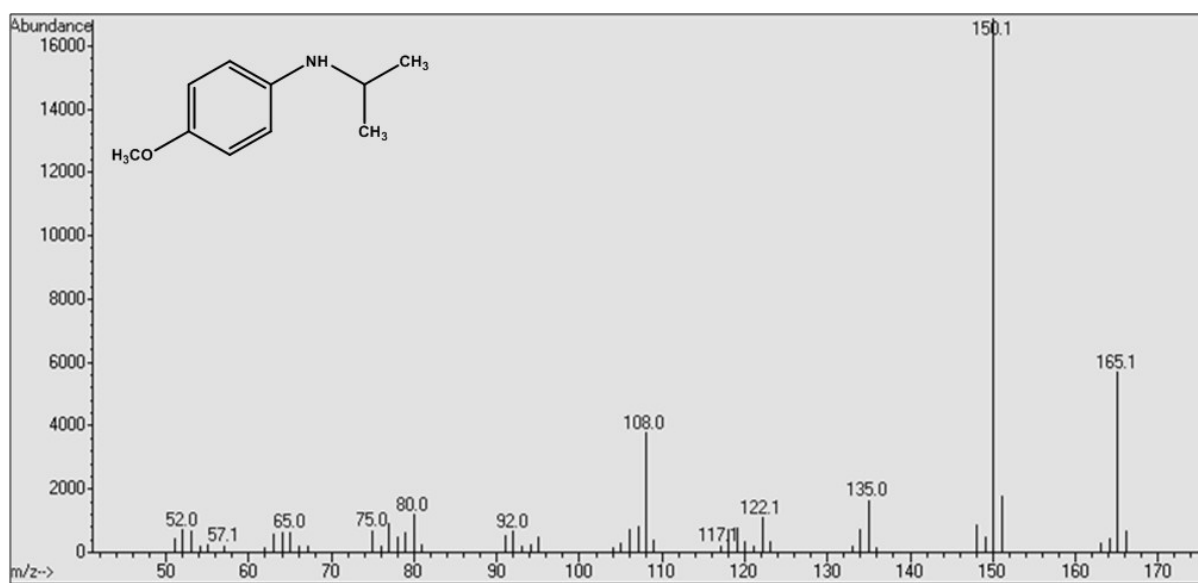

## Entry 7

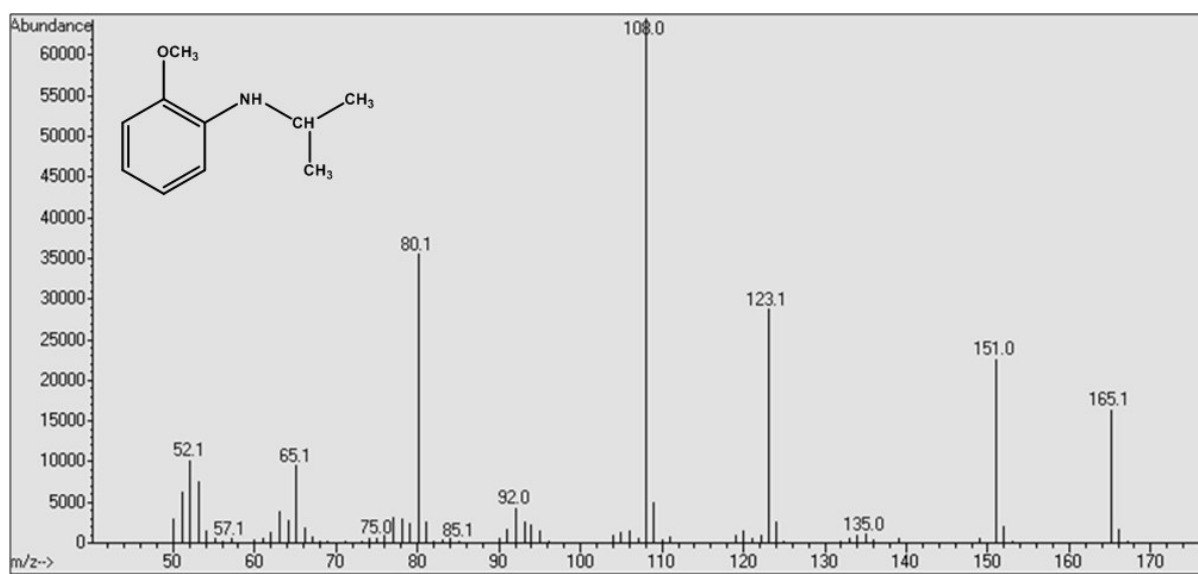

### Entry 8

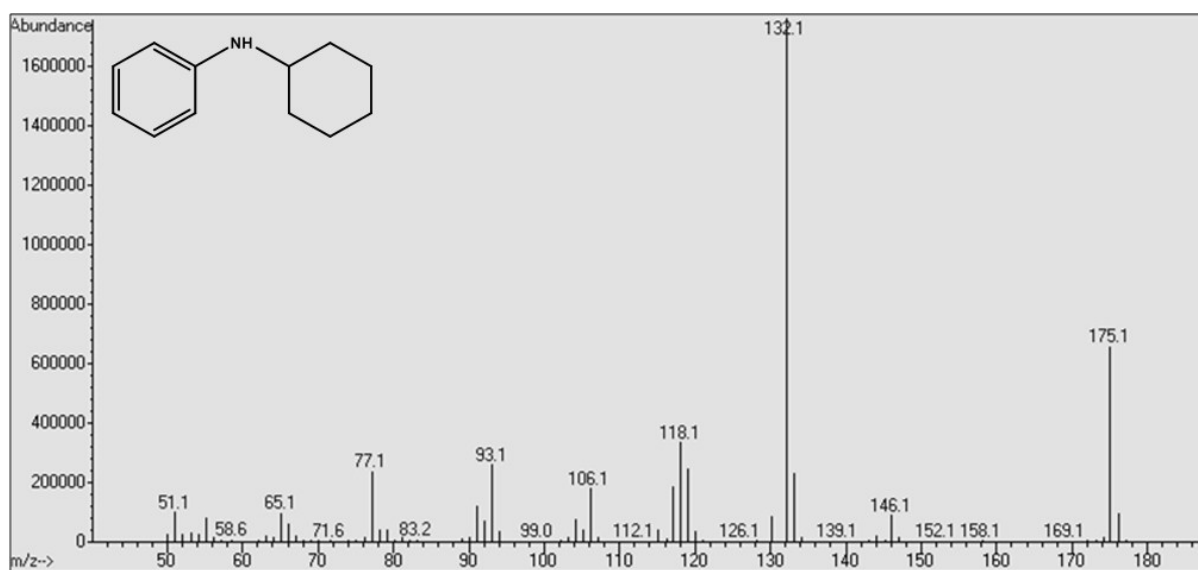

### Entry 9

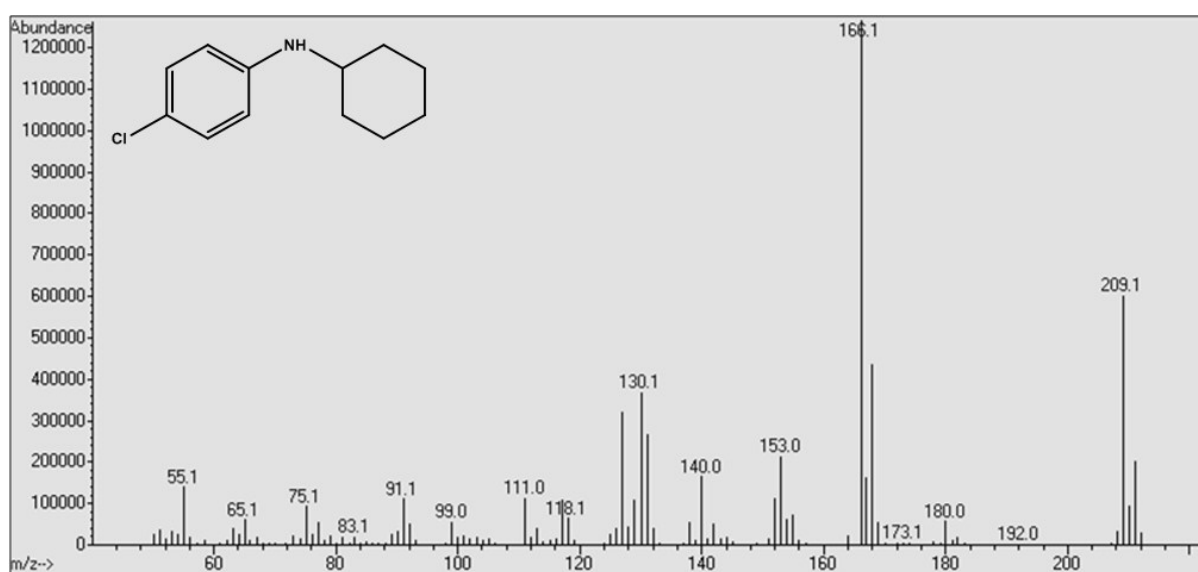



### Entry 10

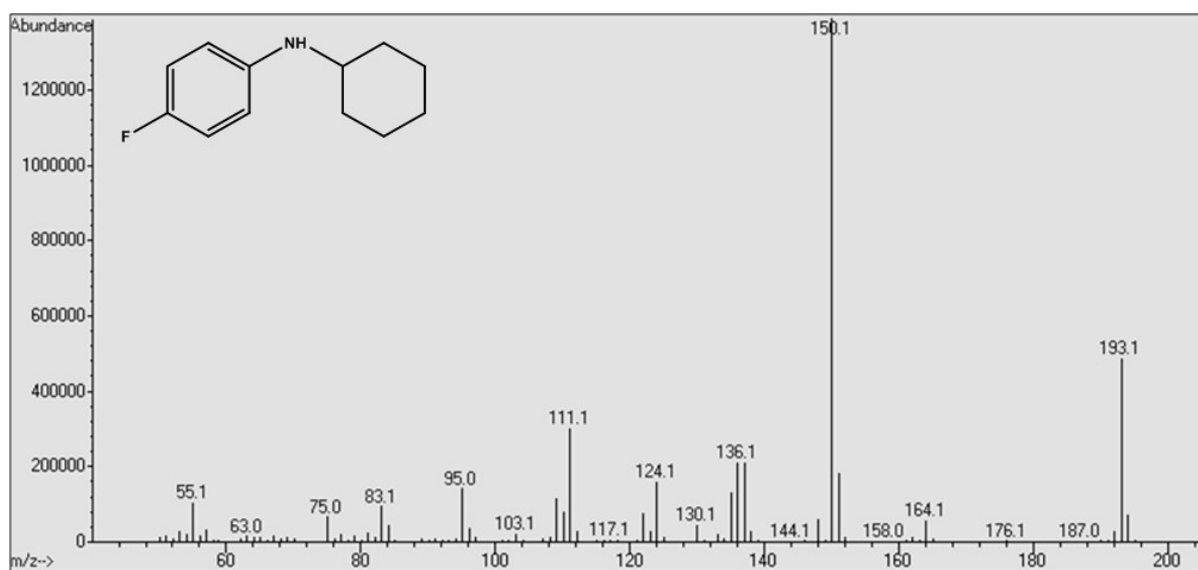

### Entry 11

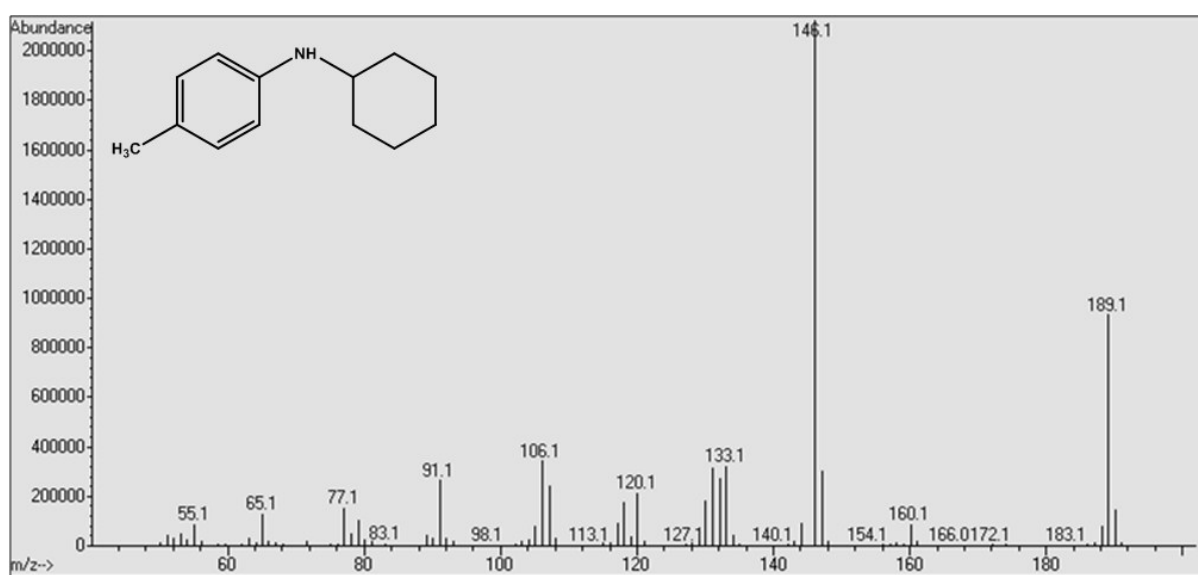

### Entry 12

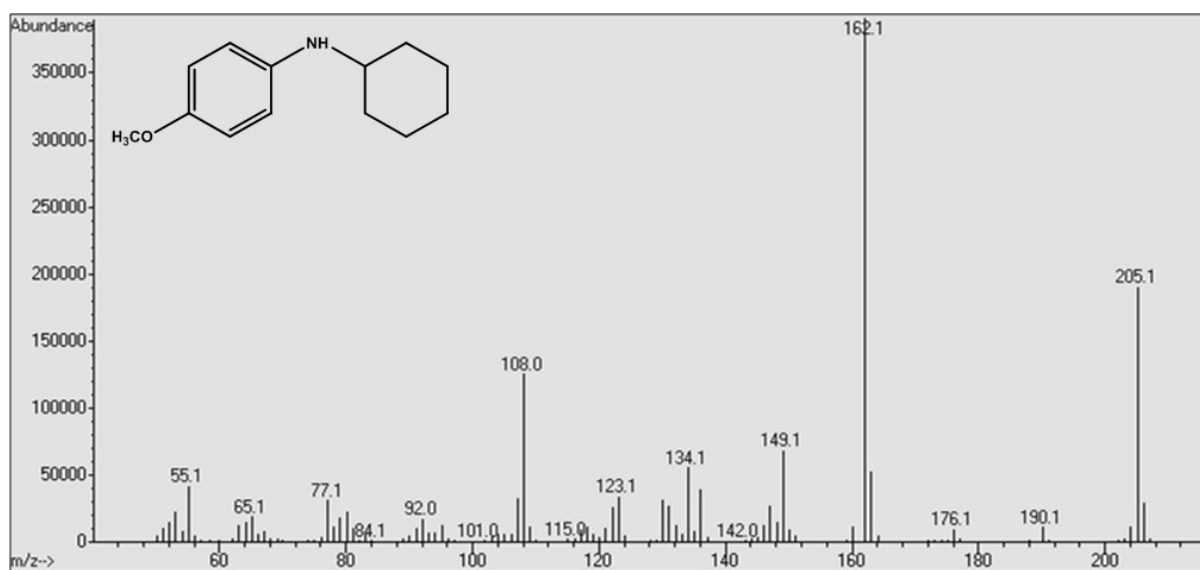

### Entry 13

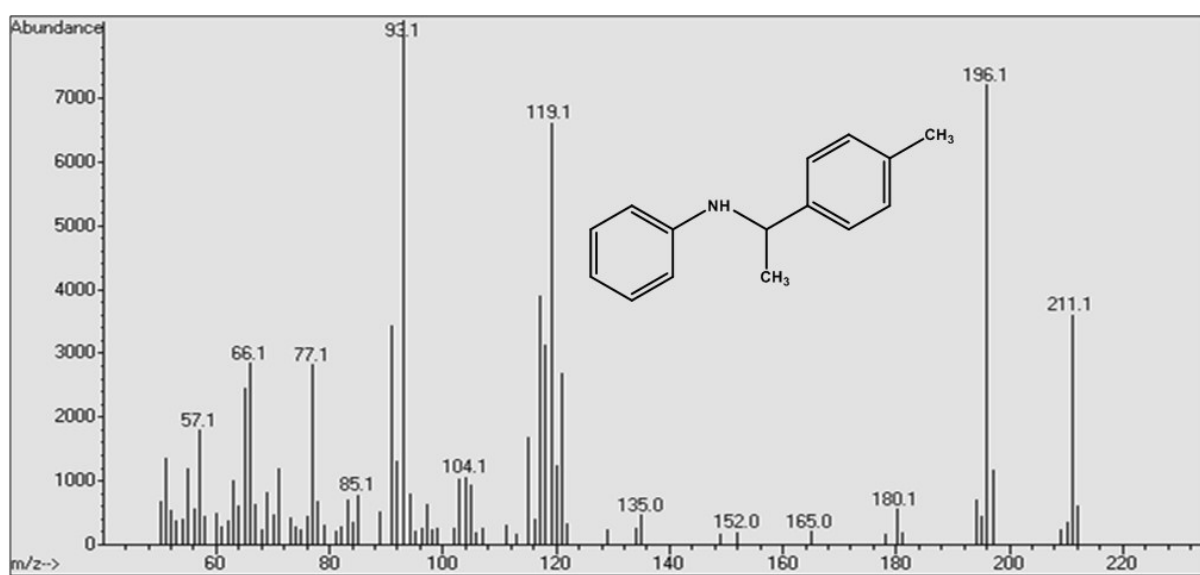

### Entry 14

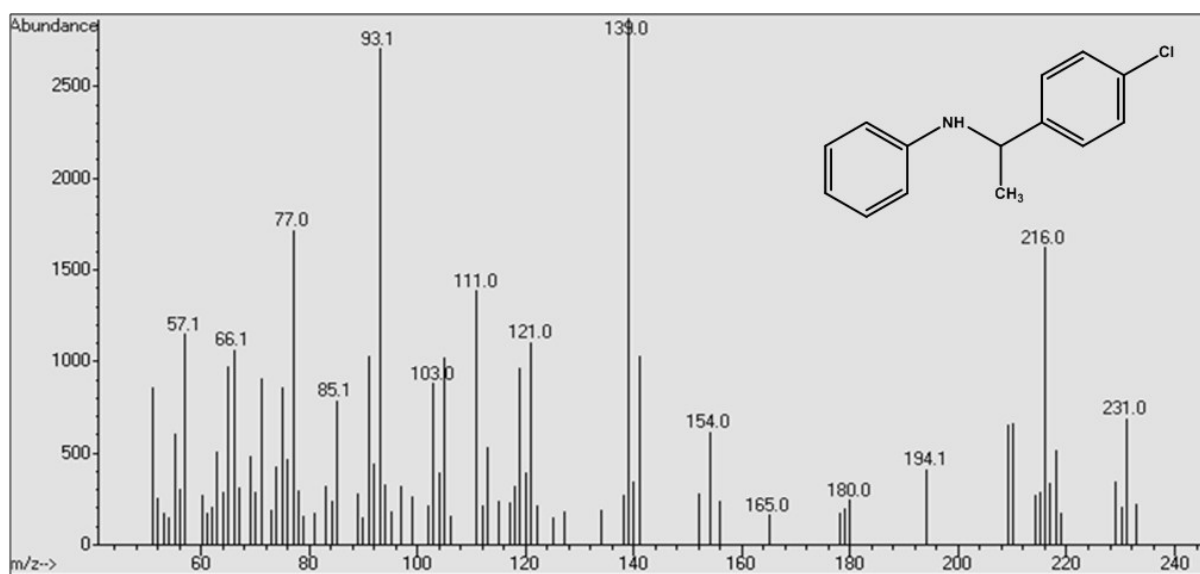

### Entry 15

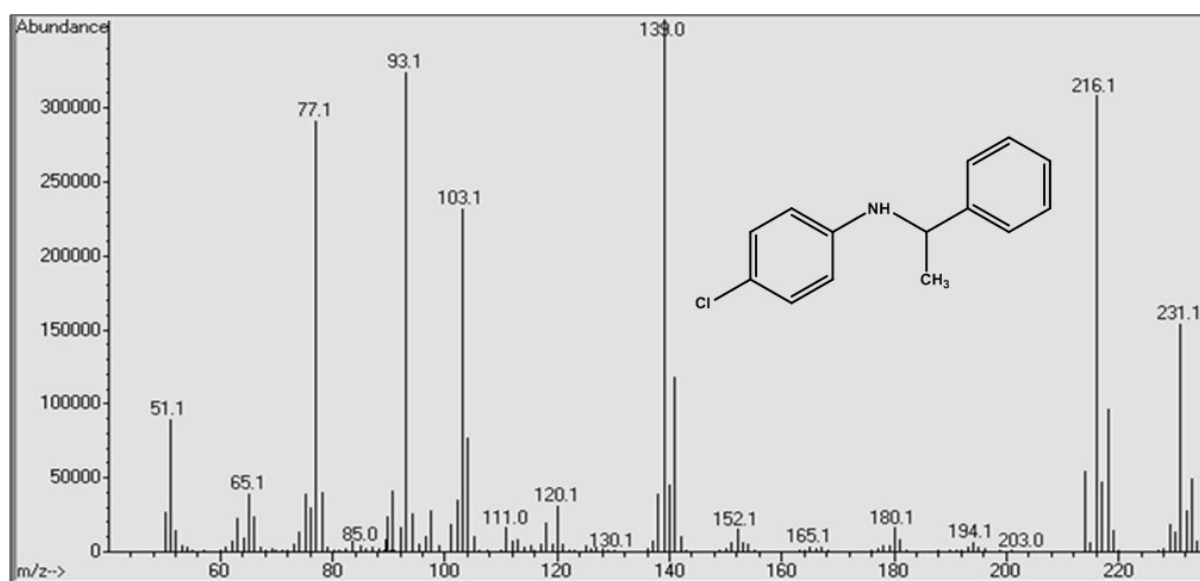

Supplement: c5nj02495a1.pdf [file c5nj02495a1.pdf]
